# Supplementary material
Source: publisher site journal article supplement (http://www.degruyter.com/publication/journal_key/JEM/downloadAsset/JEM_JEM_Instructions%20for%20Authors%20and%20Reference%20Style%20Formatting.pdf)
Supplement: Supplementary file 1 [file JEM_JEM_Instructions%20for%20Authors%20and%20Reference%20Style%20Formatting.pdf]

## **Journal of Econometric Methods: Information for Authors**

### **I. Editorial policy**

#### **Unpublished material**

Submission of a manuscript to the *Journal of Econometric Methods* implies that the work described is not copyrighted, published, or submitted elsewhere, except in abstract form. The corresponding author should ensure that all co-authors approve the manuscript before its submission.

#### **Ethical conduct of research**

The authors must describe and confirm the safeguards put in place to meet ethical standards where applicable.

#### **Conflict of interest**

When authors submit a manuscript, they are responsible for recognizing and disclosing financial and/or other conflicts of interest that might bias their work and/or could inappropriately influence their judgment. If no acknowledgement is given, the Publishers assume that no such conflict of interest exists.

#### **Copyright**

Manuscripts are accepted on the condition of a transfer of copyright (for U.S. government employees: to the extent transferable) to the *Journal of Econometric Methods*. Once the manuscript is accepted, it may not be published elsewhere without the consent of the copyright holders.

### **II. Submission of manuscripts**

Manuscripts should be submitted online at:

<https://mc.manuscriptcentral.com/dgjem>

### **III. Preparation of manuscripts**

#### **Language**

All manuscripts must be written in clear and concise English. If you have reasons to doubt your proficiency with respect to spelling, grammar, etc. (e.g., because English is not your native language), then you may wish to employ—at your expense—the services of a professional language editor.

#### **General format and length**

Manuscripts should be submitted as DOCX (Word), RTF, or LaTeX files. Manuscripts submitted in LaTeX format should also include a PDF export of the document as a reference file. If possible, authors should provide large and/or complicated tables as supplementary material or an appendix. Tables cannot contain lists and should not contain images or dashed lines. All figures and tables should be cited in the text and should have a caption/legend.

A short template can be found at [http://www.degruyter.com/staticfiles/pdfs/DeGruyter\\_LaTeX\\_template\\_package.zip](http://www.degruyter.com/staticfiles/pdfs/DeGruyter_LaTeX_template_package.zip)

#### **Cover letter**

Each manuscript should be accompanied by a cover letter briefly highlighting the main features of the contribution.

#### **Articles**

Review articles aim to summarize recent significant advances in research. Authors should strive for brevity and clarity. The final structure of the review will depend on the focus, but wherever possible the following sections should be included: Title page, abstract, keywords, list of abbreviations, and an introduction; further, body of review, expert opinion, outlook,

highlights, and references. A nomenclature list at the end of the paper is recommended when many symbols are included in the text.

#### **References**

Please use the Chicago Manual of Style author-date system for parenthetical citation in text and the related reference list entry. For more specific details please visit [http://www.chicagomanualofstyle.org/tools\\_citationguide.html](http://www.chicagomanualofstyle.org/tools_citationguide.html) and click on the Author-Date tab.

#### **Mathematics and equations**

- Roman letters used in mathematical expressions as variables must be italicized. Roman letters used as part of multi-letter function names should not be italicized. Subscripts and superscripts must be a smaller font size than the main text
- Type short mathematical expressions inline
- Longer expressions must appear as display math, as must expressions using many different levels (e.g., such as fractions)
- Ensure that Equations are typed or created with a plug-in, such as Word Formula Editor or MathType. Mathematical expressions must not be displayed as images
- Important definitions or concepts can also be set off as display math
- Number your equations sequentially
- Insert a blank line before and after each equation
- Whether equation numbers are on the right or left is the choice of the author(s). However, make sure to be consistent in this
- When proofing your document, pay particular attention to the rendering of the mathematics, especially symbols and notation drawn from other-than-standard fonts

#### **Fonts**

- Only use Unicode fonts (e.g. Times New Roman, Arial)

#### **Colored text**

- Set the font color to black for the majority of the text. De Gruyter encourages authors to take advantage of the ability to use color in the production of figures, maps, images, and graphs. However, you need to appreciate that this will cause some of your readers problems when they print the document on a black and white printer. For this reason, you are advised to avoid the use of colors in situations where their translation to black and white would render the material illegible or incomprehensible.

#### **Emphasized text, titles, and foreign terms**

- To indicate text you wish to emphasize, use italics rather than underlining. The use of color to emphasize text is discouraged.
- Foreign terms should be set in italics rather than underlined.
- Titles of books, movies, etc., should be set in italics rather than underlined.

#### **Abbreviations**

The use of abbreviations and acronyms is permitted provided they are defined the first time they are used.

#### **Headings**

Headings (e.g., title of sections) should be distinguished from the main body text:

- Clearly indicate the heading hierarchy.
- Be consistent in whether or not you use headline case, or you capitalize the first word and leave the rest in lower-case.

#### **Tables**

Submit tables on separate pages or as separate files and number them consecutively using Arabic numerals. Provide a short descriptive title, column headings, and (if necessary)

footnotes to make each table self-explanatory. Refer to tables in the text as Table 1, etc. Use Table 1, etc. in the table legends. Especially large or complex Tables should be supplied as Supplementary Material or as an Appendix.

## Figures

**Graphical abstract figure and text for the table of contents (optional):** A graphical abstract figure (minimum resolution of 300 dpi) and a graphical abstract text (consisting of the article title, all author names without affiliations, and a one sentence summary of the manuscript, followed by 3–5 keywords) for the table of contents may be provided. These elements are meant to provide the reader a summary of the research reviewed in the paper.

**General requirements:** All illustrations must be of reproduction-ready quality. They will be reduced in size to fit, whenever possible, the width of a single column. Lettering of all figures within the article should be uniform in style (preferably a sans serif typeface like Helvetica) and of sufficient size (ca. 8 pt.). Uppercase letters A, B, C, etc. should be used to identify parts of multi-part figures. Cite all figures in the text in numerical order. Indicate the approximate placement of each figure within the manuscript text. Do not embed figures within the text body of the manuscript; submit figures as separate files.

**Halftone figures (grayscale and color)** should have a **minimum resolution of 300 dpi and be of good contrast; recommended file format: tif.** Authors are encouraged to submit illustrations in color if necessary for conveying their scientific content. Publication of color figures is provided free of charge.

**Line drawings** must be of reproduction-ready quality. Please note that faint shading may be lost upon reproduction. When drawing bar graphs, use patterning instead of grayscales. Lettering of all figures should be uniform in style. **A resolution of 1200 dpi is recommended; recommended file format: tif.**

**Figure captions:** Provide a short descriptive title and a legend to make each figure self-explanatory, if necessary. Explain all symbols used in the figures. Remember to use the same abbreviations as in the text body. Captions for all figures should be included and clearly marked at the end of the manuscript.

## Permissions

It is the authors' responsibility to obtain permission to reproduce original or modified material that has been previously published. Copyright permissions can be obtained through the Copyright Clearance Center ([www.copyright.com](http://www.copyright.com)).

## IV. Proofs, offprints, NIH funded research

### Proof for correction

Authors of accepted papers will be able to proofread their article in our Online Proofing System before publication. At the proof stage, only minor changes, other than corrections of typesetter errors, are allowed.

### Offprints

The electronic files of typeset articles in Adobe Acrobat PDF format are provided free of charge; corresponding authors receive notification that their article has been published online.

### Note for authors of NIH-funded research

De Gruyter acknowledges that the author of a US-agency-funded article retains the right to provide a copy of the final manuscript to that agency upon acceptance for publication or thereafter, for

public archiving in PubMed Central 12 months after publication in the journal. Note that only the accepted version of the manuscript, not the PDF file of the published article, may be used for NIH archiving.

**Please contact the Editorial Office for any further questions:**

Zofia Szafranska-Czajka

Journals Coordinator

[zofia.szafranska-czajka@degruyter.com](mailto:zofia.szafranska-czajka@degruyter.com)

## CMS (Author-Date) Reference Style

### REFERENCE ENTRIES

#### In-text citation

|                                                                  | Direct citation                                                                                            | Indirect citation                               |
|------------------------------------------------------------------|------------------------------------------------------------------------------------------------------------|-------------------------------------------------|
| Single author                                                    | O'Quigley (2000, 9-15)                                                                                     | (O'Quigley 2000, 9-15)                          |
| Single author: multiple articles in different years              | [order given in manuscript will not be altered]                                                            | (Wald 2019; Wald 2021)                          |
| Single author: multiple articles in one year                     | [order given in manuscript will not be altered]                                                            | (Wald 2021a; Wald 2021b)                        |
| Two authors                                                      | Greenland and Maldonado (1994)                                                                             | (Greenland and Maldonado 1994)                  |
| Three authors                                                    | Robins, Breslow, and Greenland (1986)                                                                      | (Robins, Breslow, and Greenland 1986)           |
| More than three authors                                          | Mantel et al. (1977)                                                                                       | (Mantel et al. 1977)                            |
| Series of references                                             | [order given in manuscript will not be altered]                                                            | [order given in manuscript will not be altered] |
| Same author group with different years                           | Smith et al. (1985, 1986)                                                                                  | (Smith et al. 1985, 1986)                       |
| Same author group with same year                                 | Lawrence and David (2009a, 2009b)                                                                          | (Lawrence and David 2009a, 2009b)               |
| First releases                                                   | Mansfield ([1922] 1993)                                                                                    | (Mansfield [1922] 1993)                         |
| Author (with same surname and different initials) with same year | [order given in manuscript will not be altered]<br>T. H. E. Smith et al. (2003) and A. Smith et al. (2003) | [order given in manuscript will not be altered] |

#### Reference list

##### General remarks

Entries are in alphabetical order.

DOIs must be provided wherever available. If no DOI is available for a journal or magazine article, the URL and access date must be included, e.g.:

Farkas, M. 2017. "Never Neutral: Critical Librarianship and Technology." *American Libraries*.  
<https://americanlibrariesmagazine.org/2017/01/03/never-neutral-critlib-technology/> (accessed January 7, 2021).

For all documents on the web that do not have a DOI a URL and access date must be provided.

Short URLs (e.g., URLs with bit.ly, tinyurl, shortURL etc.) are not acceptable and the full URL must be provided.

##### Journal

Kamtekar, R. 2016. "The Soul's (After-) Life." *Ancient Philosophy* 36 (6): 115–32. <https://doi.org/10.1086/690235>.

### Multiple articles by the same author in different years

[chronologically from old to new]

Wald, C. 2012. ““Medieval Shakespeare?”: Introduction.” *Shakespeare* 8 (4): 351–5. <https://doi.org/10.1080/17450918.2012.731703>.

Wald, C. 2021. “The Spectral Returns of *The Merchant of Venice* in Marina Carr’s *Portia Coughlan*: ‘Only his shadow?’.” *Shakespeare Bulletin* 39 (2): 241–60. <https://doi.org/10.1353/shb.2021.0023>.

### Multiple articles by the same author in one year

[alphabetized by title]

Wald, C. 2021a. “The Spectral Returns of *The Merchant of Venice* in Marina Carr’s *Portia Coughlan*: ‘Only his shadow?’.” *Shakespeare Bulletin* 39 (2): 241–60. <https://doi.org/10.1353/shb.2021.0023>.

Wald, C. 2021b. ““Why Didn’t You Just Stay Where You Were, a Relic in the Memory of Poets?”: Yoruban Ritual and Sororal Commonality in Fémi Ôsófisan’s *Tègònni: An African Antigone*.” *The Journal of Commonwealth Literature* 56 (2): 201–17. <https://doi.org/10.1177/0021989418773142>.

### Journal with supplement

Agha, A. 2015. “Tropes of Branding in Forms of Life.” In “The Semiotic Corporation,” edited by K.-N. Koh and G. Urban. Supplement, *Signs and Society* 3, no. S1: S174–94. <https://doi.org/10.1086/679004>.

### Corporate publication

IFLA. 2021. *IFLA Annual Report 2020*. The Hague: International Federation of Library Associations and Institutions (IFLA). <https://repository.ifla.org/handle/123456789/1095> (accessed April 26, 2021).

### et al. usage (not allowed – all the authors are included)

Wolchik, S. A., S. G. West, I. N. Sandler, J. Tein, D. Coatsworth, L. Lengua, and W. A. Griffin. 2000. “An Experimental Evaluation of Theory-Based Mother and Mother-Child Programs for Children of Divorce.” *Journal of Consulting and Clinical Psychology* 68 (5): 843–56. <https://doi.org/10.1037/0022-006X.68.5.843>.

### Epub ahead of print (DOI)

Tang, R., and K. E. Oh. 2022. “The Impact of Types of News on Mobile News Consumption Behavior: A Mixed-Method Research.” *Libri*. <https://doi.org/10.1515/libri-2021-0071>.

### Reference – forthcoming

Choi, S., D. Furceri, Y. Huang, and P. Loungani. Forthcoming. “Aggregate Uncertainty and Sectoral Productivity Growth: The Role of Credit Constraints.” *Journal of International Money and Finance*.

### Book/monograph

Reeve, C. D. C. 1989. *Socrates in the Apology*. Indianapolis: Hackett Publishing.

### Book with edition

Scherer, F., and D. Ross. 1990. *Industrial Market Structure and Economic Performance*, 3rd ed. Boston: Houghton Mifflin.

### Edited book

Parker, R. H., and G. C. Harcourt, eds. 1969. *Readings in the Concept and Measurement of Income*. London: Cambridge University Press.

### Edited book with chapter title and editors

Annas, J. 2015. "Plato's Defense of Justice: The Wrong Kind of Reason?" In *The Quest for the Good Life: Ancient Philosophers on Happiness*, edited by E. K. Øyvind Rabbås, H.F. Emilsson, and M. Tuominen, 275–94. Oxford: Oxford University Press.

### Book series

Stole, L. 2007. "Price Discrimination and Competition." In *Handbook of Industrial Organization*, Vol. 3, edited by M. Armstrong, and R. H. Porter, 2221–99. Amsterdam: Elsevier Science Publishers B.V.

Piosik, M., J. Taborek, and M. Woźnicka, eds. 2021. *Korpora in der Lexikographie und Phraseologie*. Lexicographica. Series Major, Vol. 160. Berlin, Boston: De Gruyter. <https://doi.org/10.1515/9783110716955>.

Fuertes-Olivera, P. A., and S. Tarp. 2014. *Theory and Practice of Specialised Online Dictionaries: Lexicography versus Terminography*. Lexicographica. Series Major, Vol. 146. Berlin, Boston: De Gruyter. <https://doi.org/10.1515/9783110349023>.

### Websites

Evstatieva, M. 2020. "Anatomy of a COVID-19 Conspiracy Theory." *NPR All Things Considered*. <https://www.npr.org/2020/07/10/889037310/anatomy-of-a-covid-19-conspiracy-theory> (accessed January 7, 2021).

Williams, L. 2014. "Library Programming: Don't Just Follow the Crowd." *Illinois Library Association Reporter* 32: 18–20. [https://www.ila.org/content/documents/Reporter\\_1014.pdf](https://www.ila.org/content/documents/Reporter_1014.pdf) (accessed May 10, 2019).

### Web documents

American Library Association. 2014. *National Impact of Library Public Programs Assessment: White Paper*. American Library Association. [https://nilppa.org/wp-content/uploads/2014/NILPPA\\_White\\_Paper\\_FINAL\\_web.pdf](https://nilppa.org/wp-content/uploads/2014/NILPPA_White_Paper_FINAL_web.pdf) (accessed July 1, 2019).

### Proceedings/Conferences

Herculano-Houzel, S., C. E. Collins, P. Wong, J. H. Kaas, and R. Lent. 2008. "The Basic Nonuniformity of the Cerebral Cortex." In *Proceedings of the Seventh International Conference on Enterprise Information Systems, Miami, FL*, 97–108. Berlin: Springer-Verlag. <https://doi.org/10.1073/pnas.0805417105>.

Lee, D. J., D. Bates, C. Dromey, X. Xu, and S. Antani. 2003. "An imaging system correlating lip shapes with tongue contact patterns for speech pathology research." In *c2003. CBMS 2003. Proceedings of the 16th IEEE Symposium on Computer-Based Medical Systems; 2003 Jun 26–27; New York*, edited by M. Krol, S. Mitra, and D. J. Lee, 307–13. Los Alamitos: IEEE Computer Society. <https://doi.org/10.1109/CBMS.2003.1212807>.

### Electronic publication with DOI

Clifford, P. G. 2021. *The China Paradox: At the Front Line of Economic Transformation*. Berlin, Boston: De Gruyter. <https://doi.org/10.1515/9783110724233>.

### Electronic publication without DOI

Kurland, P. B., and R. Lerner, eds. 1987. *The Founders' Constitution*. Chicago: University of Chicago Press. <http://press-pubs.uchicago.edu/founders/> (accessed March 9, 2022).

## Thesis/Dissertation

Rahman, M. 2013. "Using Authentic Materials in the Writing Classes: Tertiary Level Scenario." PhD diss., BRAC University. <http://dspace.bracu.ac.bd/xmlui/handle/10361/3112> (accessed December 15, 2021).

## Database

Milberger, S. 2002. *Evaluation of Violence Against Women With Physical Disabilities in Michigan, 2000–2001*. ICPSR version. Detroit: Wayne State University. Distributed by Ann Arbor, MI: Inter-University Consortium for Political and Social Research. <https://doi.org/10.3886/ICPSR03414>.

## Report

U.S. Federal Energy Regulatory Commission. 2020. *Annual Report of the U.S. Federal Energy Regulatory Commission*. Washington, D.C.: GPO. <https://www.ferc.gov/sites/default/files/2021-02/2020-Annual-Report-of-FOIA.pdf> (accessed December 15, 2021).

## Patent

Iizuka, M., and H. Tanaka. Cement admixture. US Patent 4,586,960, filed June 26, 1984, and issued May 6, 1986. <https://patft.uspto.gov/netacgi/nph-Parser?Sect1=PTO1&Sect2=HITOFF&p=1&u=/netahtml/PTO/srchnum.html&r=1&f=G&l=50&d=PALL&s1=4586960.PN> (accessed December 15, 2021).

## Standards

National Information Standards Organization. *Bibliographic References*. ANSI/NISO Z39.29-2005. Bethesda, MD: NISO, approved June 9, 2005; reaffirmed May 13, 2010. <http://www.niso.org/publications/ansiniso-z3929-2005-r2010> (accessed December 15, 2021).

## Cited film works

Weir, P., dir. *Picnic at Hanging Rock*. 1975. London: Picnic Productions, 2008. DVD.

Weir, P., dir. *The Truman Show*. 1998. Los Angeles: Paramount Pictures. 1 hr., 43 min. <https://www.netflix.com/watch/11819086> (accessed June 3, 2020).

## Social Media Sites

Chicago Manual of Style. 2015. "Is the world ready for singular they? We thought so back in 1993." Facebook, April 17, 2015. <https://www.facebook.com/ChicagoManual/posts/10152906193679151> (accessed January 21, 2022).

Souza, P. (@petesouza). 2016. "President Obama bids farewell to President Xi of China at the conclusion of the Nuclear Security Summit." Instagram photo, April 1, 2016. <https://www.instagram.com/p/BDrmfXTtNtCt> (accessed January 21, 2022).

## Translations

Kant, I. [1781] 1929. *Critique of Pure Reason*. Translated by N. Kemp Smith. London: Macmillan & Co., Ltd.

## Special Issues

Tomii, R., and M. Yoshimoto, eds. 2013. "Collectivism in Twentieth-Century Japanese Art." Special issue, *Positions: Asia Critique* 21, no. 2. <https://doi.org/10.1215/10679847-2018256>.

### Translated titles

Takeuchi, Y. 武内義雄. 1939. *Jukyō no seishin* 儒教の精神 [The Spirit of Confucianism]. Tōkyō: Iwanami shoten 岩波書店.

### First releases

[follow manuscript style]
